# Supplementary material
Source: Springer Nature journal article supplement (https://www.springermedizin.de/resource/supplementary/12955_2011_970_MOESM8_ESM.pdf/9558886)
Supplement: MOESM8 [file 9558886]

**Table 3** Bivariate relationships (Pearson's  $r$ ) and stepwise linear regression analysis (standardized beta coefficients  $\beta$ ). EQ-VAS at baseline six- and at 12- months follow-up scores as dependent variables.

| Independent variables                                  | EQ baseline<br>( $N = 76$ ) |              |             | EQ 12-month follow-up<br>( $N = 67$ ) |              |             |
|--------------------------------------------------------|-----------------------------|--------------|-------------|---------------------------------------|--------------|-------------|
|                                                        | $r$                         | $\beta$      | $P$         | $r$                                   | $\beta$      | $P$         |
| <b><i>Step 1. Sociodemographic characteristics</i></b> |                             |              |             |                                       |              |             |
| Age (years)                                            | -0.20                       | -0.04        | 0.75        | -0.09                                 | -0.11        | 0.33        |
| Sex (men as reference)                                 | -0.12                       | -0.10        | 0.43        | -0.25*                                | -0.22        | 0.06        |
| Work status (no paid work as ref.)                     | 0.24*                       | 0.33         | 0.02        | 0.34*                                 | 0.27         | 0.03        |
| <b>Explained variance (<math>R^2</math>)</b>           |                             | <b>15.2%</b> | <b>0.03</b> |                                       | <b>14.9%</b> | <b>0.02</b> |
| <b><i>Step 2. Health behaviour</i></b>                 |                             |              |             |                                       |              |             |
| Levels of physical activity (0-4)                      | 0.26*                       | 0.06         | 0.65        | 0.20                                  | 0.16         | 0.20        |
| <b>Explained variance (<math>R^2</math>)</b>           |                             | <b>18.3%</b> |             |                                       | <b>17.3%</b> |             |
| <b>Change of variance (<math>R^2</math> – change)</b>  |                             | <b>3.1%</b>  | <b>0.16</b> |                                       | <b>2.4%</b>  | <b>0.19</b> |
| <b><i>Step 3. Environmental characteristics</i></b>    |                             |              |             |                                       |              |             |
| Social support (from close persons)(1-5)               | 0.28*                       | 0.31         | 0.02        | 0.29*                                 | 0.33         | 0.005       |

|                                                       |        |       |      |        |              |             |              |
|-------------------------------------------------------|--------|-------|------|--------|--------------|-------------|--------------|
| <b>Explained variance (<math>R^2</math>)</b>          |        |       |      |        | <b>27.9%</b> |             | <b>25.7%</b> |
| <b>Change of variance (<math>R^2</math> – change)</b> |        |       |      |        | <b>9.6%</b>  | <b>0.01</b> | <b>8.4%</b>  |
| <b><i>Step 4. Personal factors</i></b>                |        |       |      |        |              |             |              |
| Self-esteem (RSES-4)                                  | -0.19  | 0.04  | 0.82 | -0.06  | 0.04         | 0.74        |              |
| (high scores=lower self-esteem)                       |        |       |      |        |              |             |              |
| Self-efficacy (GSE)                                   | 0.24*  | 0.21  | 0.15 | 0.20   | 0.18         | 0.15        |              |
| Coping style (BACQ) (avoidance as ref.)               | 0.34*  | -0.09 | 0.58 | -0.04  | -0.16        | 0.26        |              |
| <b>Explained variance (<math>R^2</math>)</b>          |        |       |      |        | <b>31.2%</b> |             | <b>31.0%</b> |
| <b>Change of variance (<math>R^2</math> – change)</b> |        |       |      |        | <b>3.3%</b>  | <b>0.51</b> | <b>5.3%</b>  |
| <b><i>Step 5. Illness perception</i></b>              |        |       |      |        |              |             |              |
| Illness impact                                        | -0.44* | -0.08 | 0.56 | -0.22* | -0.08        | 0.54        |              |
| <b>Explained variance (<math>R^2</math>)</b>          |        |       |      |        | <b>31.6%</b> |             | <b>32.1%</b> |
| <b>Change of variance (<math>R^2</math> – change)</b> |        |       |      |        | <b>0.5%</b>  | <b>0.56</b> | <b>1.1%</b>  |
| <b><i>Step 6. Treatment</i></b>                       |        |       |      |        |              |             |              |
| Surgery (no= reference)                               |        |       |      | 0.24*  | 0.35         | 0.003*      |              |

|                                                       |              |              |
|-------------------------------------------------------|--------------|--------------|
| <b>Explained variance (<math>R^2</math>)</b>          | <b>42.0%</b> |              |
| <b>Change of variance (<math>R^2</math> – change)</b> | <b>9.9%</b>  | <b>0.003</b> |

---

\*  $P < 0.05$

Note: High EQ scores represent high health-related quality of life.
